# Supplementary material
Source: Springer Nature journal article supplement (https://www.springermedizin.de/resource/supplementary/12885_2009_1974_MOESM9_ESM.pdf/9460220)

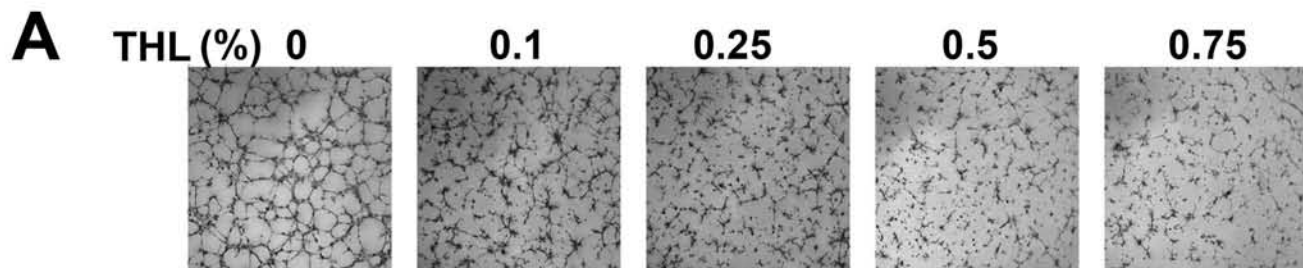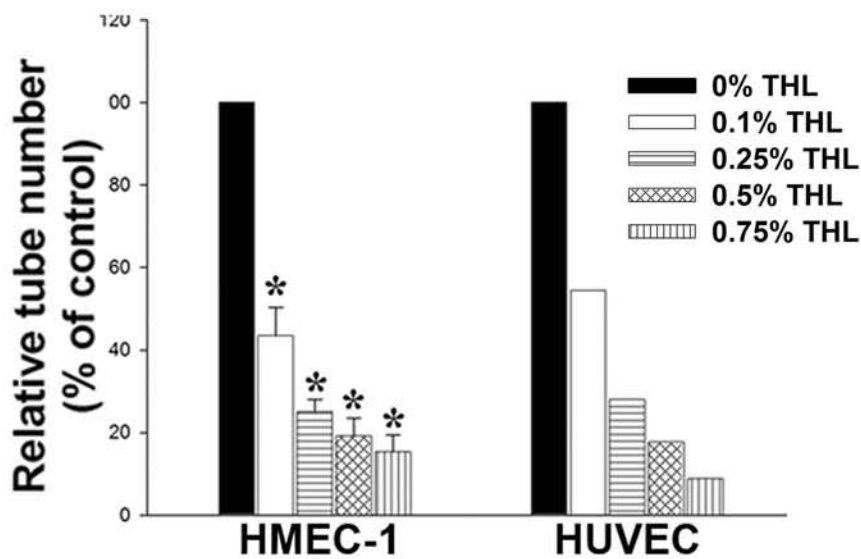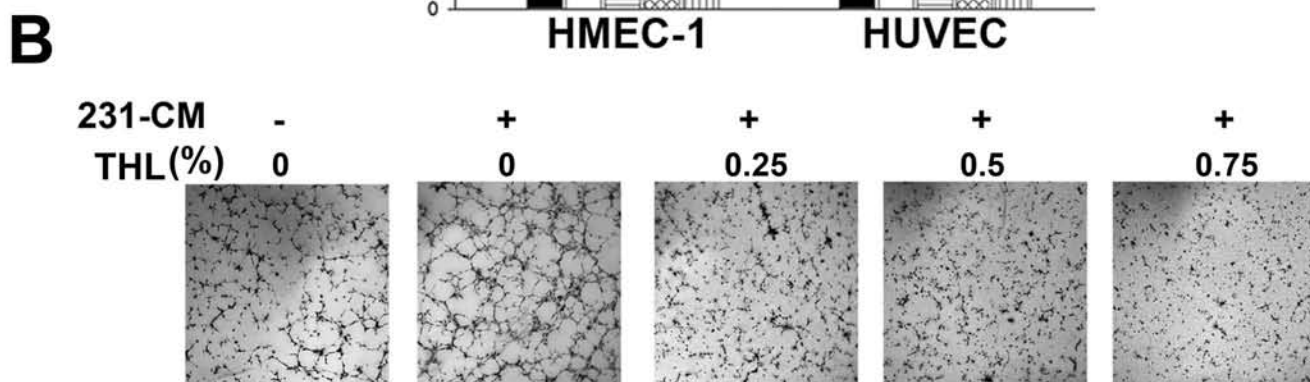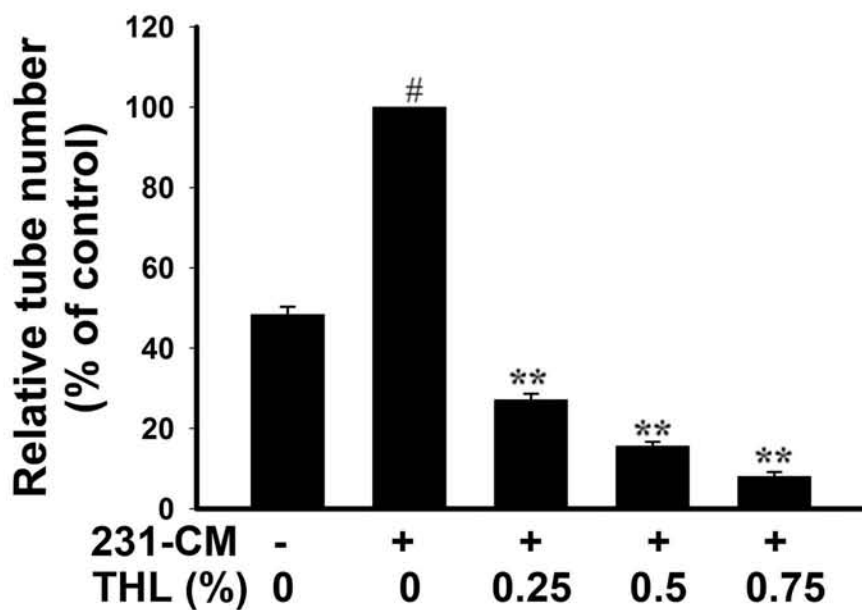

Supplement: MOESM9 [file 9460220]
